# Supplementary material for: Low-complexity a posteriori probability approximation in EM-based channel estimation for trellis-coded systems
Source: Springer Nature journal article supplement (doi:10.1186/1687-1499-2014-153), 2014-09-17

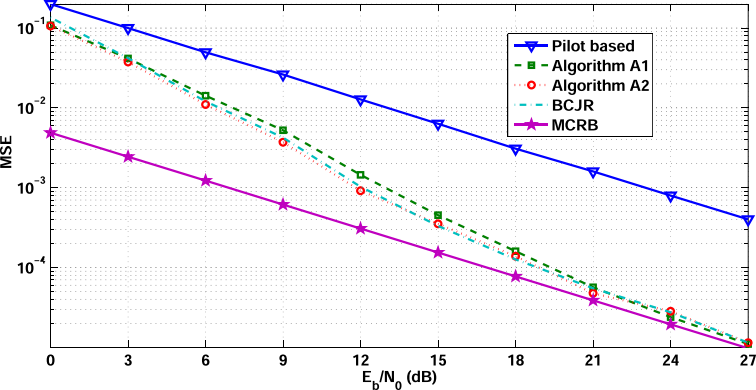

Supplement: 13638_2014_973_MOESM2_ESM.pdf [file 13638_2014_973_MOESM2_ESM.pdf]
